# Supplementary material
Source: Frontiers journal article supplement (https://www.frontiersin.org/articles/522810)
Supplement: Data_Sheet_1.PDF [file Data_Sheet_1.PDF]

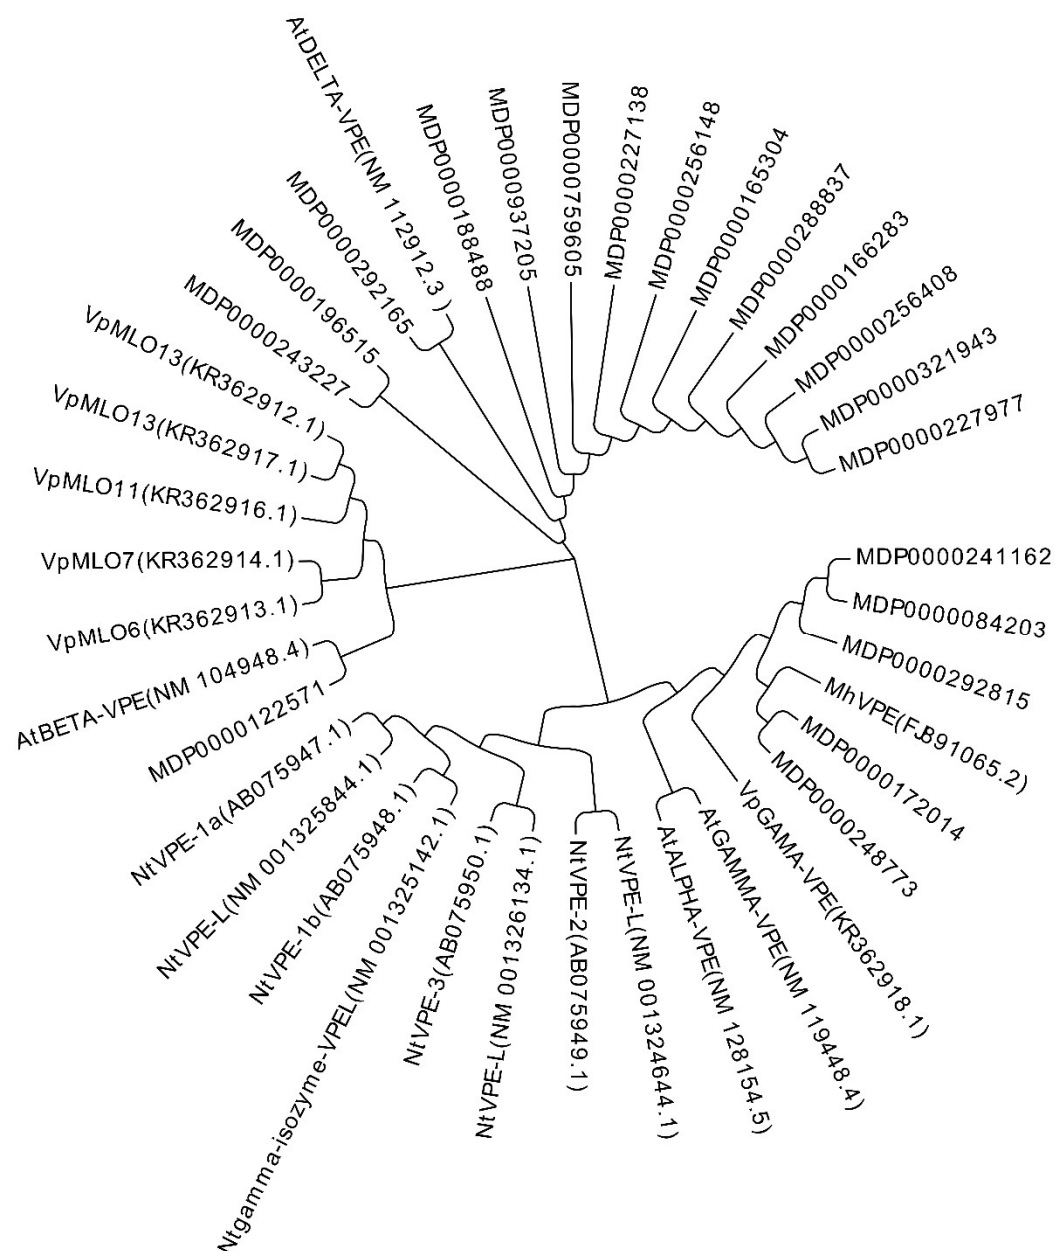

**Supplemental Fig. S1 Phylogenetic analysis (circle trees) of apple, *Arabidopsis*, tobacco, soybean, and *Vitis pseudoreticulata* VPE proteins.** Phylogenetic trees were contrusted by neighbor-joining method with bootstrap values 1000 via MEGA 7.0.

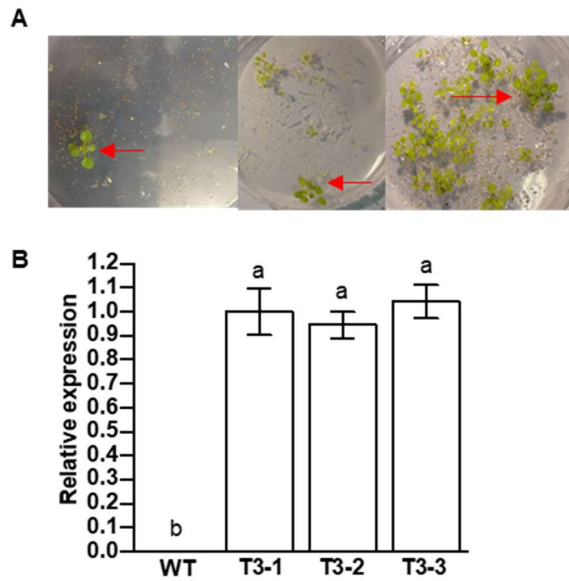

**Supplemental Fig. S2 The transformation of MDP0000172014 into Col-1 *Arabidopsis*.** (A) Rapid screening of kanamycin resistance of T1 transgenic *Arabidopsis*. As the arrowhead showed, the seedlings with green leaves is kanamycin-resistant seedlings. (B) The relative expression of MDP0000172014 in wildtype (WT) and transgenic *Arabidopsis* (T3). Quantitative RT-PCR was used to investigate the expression levels of each *MdVPE* genes in apple wildtype (WT) and transgenic *Arabidopsis* (T3).
